# Supplementary material
Source: MDPI journal article supplement (https://www.mdpi.com/2813-3323/2/1/4)
Supplement: s1 [file s1]

Archive with 2 entries (2 files):
- arthropoda-2834684-supplementary.pdf
- Video S1.mp4
